# Supplementary material
Source: PubMed Central journal article supplement (PMC7728860)
Supplement: 11606_2020_6113_MOESM1_ESM.pdf [file 11606_2020_6113_MOESM1_ESM.pdf]

## **INTRODUCTION**

- Welcome participants, thank them for participating
- Introduce yourself
- Review logistics – bathroom location, food, drink

## **PURPOSE OF TODAY'S FOCUS GROUP**

- You have been invited to participate because each of you has been seen by a doctor or has been to the hospital in the past year.
- We want to hear people's thoughts about different ways you can learn new, important information about your health. Today, we would like to hear your opinions about how you would want to learn about this new information.
- My role is to listen to what you have to say and understand it correctly.

## **FOCUS GROUP RULES**

- There are no right or wrong answers, only opinions.
- Please feel free to share your ideas and opinions, even if they differ from what others have said. It is helpful to hear different points of view.
- We'd like to hear from all of you equally.
- Also, feel free to talk to each other as well as to me.
- If, at any time during our discussion, you do not feel comfortable answering a question, that is fine.
- We are audio-recording our discussion to make sure we get all of your comments. We will summarize what we hear as a group but we will not identify individuals.
- Everything you say will be confidential. Nothing will be linked to your name.
- Please be respectful of others' privacy and remember that what is said in this room, stays in this room.
- Because we have limited time together, I may, for the sake of time, jump in and move the discussion forward.
- If you have any questions about our research or how your feedback will be used, please see me at the end of our discussion.
- Finally, please turn off all electronic devices for the duration of our discussion.
- Any questions?

## **PARTICIPANT WARM-UP**

When you introduce yourself, please tell us your first name (and if you prefer you can make up a name and use it during our whole discussion today) and, just for fun, where you would go on vacation if you won a free trip.

## **TOPIC OF DISCUSSION/BACKGROUND**

As I mentioned earlier, there are different ways you can learn about new information that is relevant to your health, but that is not related to the reason for which you sought care.

For example, you go to your doctor for a cough, and when the doctor places a stethoscope on your back to listen to your lungs, he or she notices a suspicious mole.

Another example: Your doctor orders a blood test to check your blood sugar, and the results show that you might have a kidney problem.

In these two examples, your doctor is the one who found the new information about you. However, there are other ways in which new, important information about your health can be learned. Now, I am going to describe an example of a way in which new, important information about your health is learned by someone other than your doctor.

## **[BEGIN SLIDESHOW]**

## **QUESTIONS**

- What are people's thoughts about receiving the information?
  - Good, bad, neutral and why?
    - Probes: Why is this good? Why is this bad?
- How would you want to receive the information?
- Who do you think should return this information to you?
- What information besides the finding itself would you want to know?

## **CLOSE**

Well that wraps things up for our conversation. Thanks for sharing your thoughts with us. I am going to turn off the recording device and we can discuss procedures for reimbursement.
