# Supplementary material
Source: PubMed Central journal article supplement (PMC7728860)
Supplement: 11606_2020_6113_MOESM2_ESM.pdf [file 11606_2020_6113_MOESM2_ESM.pdf]

# Scenario

# Hospital A

- Let's imagine, you receive care at Hospital A.
- Hospital A, like most hospitals, uses electronic health records or EHRs, to manage their patient records.
- An EHR is a computerized chart that contains information about a patient, including:
  - Diagnoses, medications, clinical visits, test results (e.g. blood tests or x-rays, MRIs), etc.
- There is an EHR for each of Hospital A's patients.

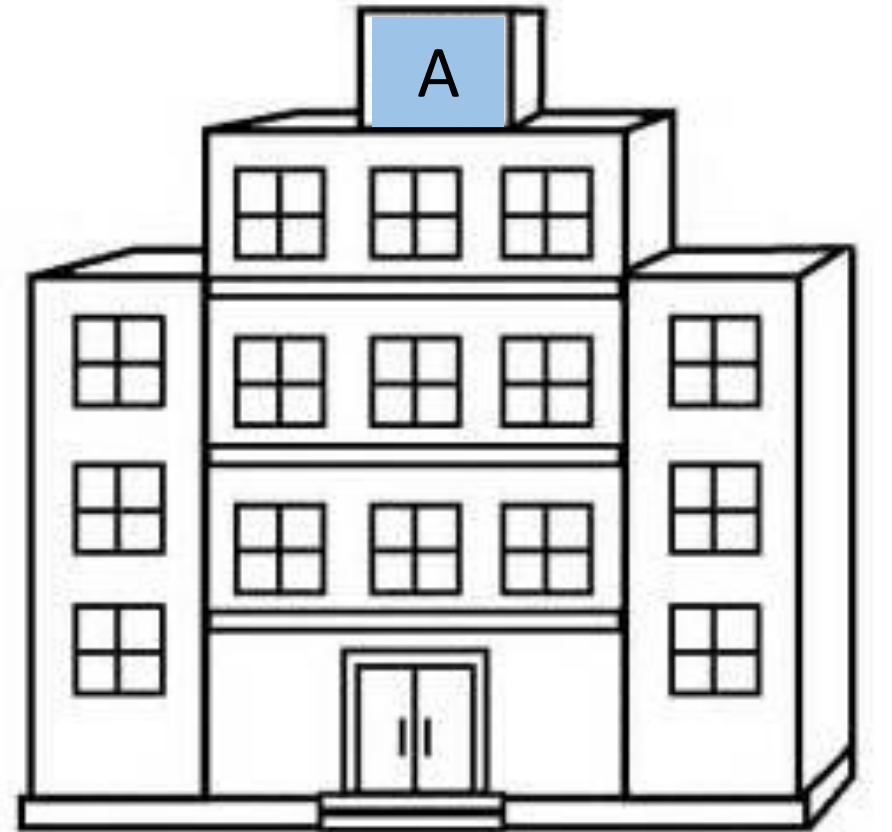

# Hospital A

- Hospital A, like other hospitals, looks for ways to improve the care they offer to their patients.
- Hospital A can use the vast amounts of information, already collected in their patient EHRs, to answer questions about health care.

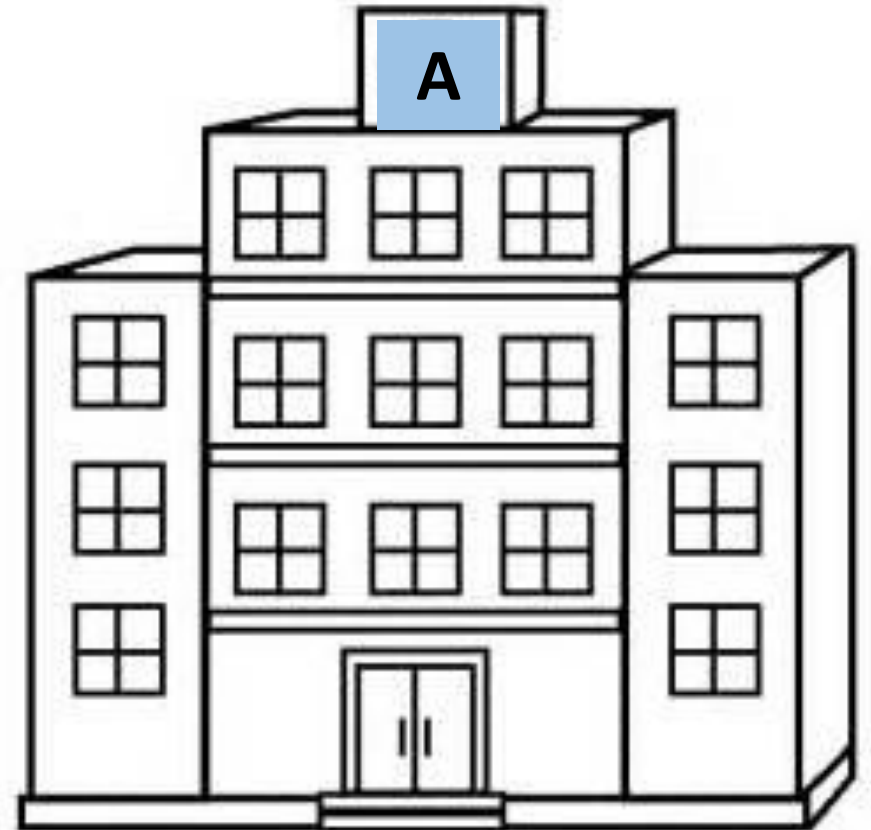

# For example:

- The team at Hospital A wants to compare two medications commonly prescribed to treat high blood pressure

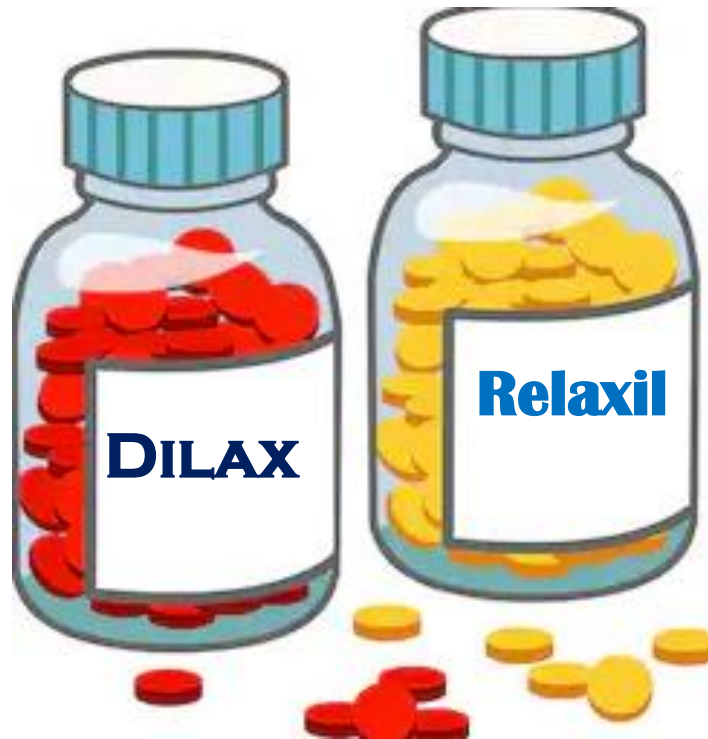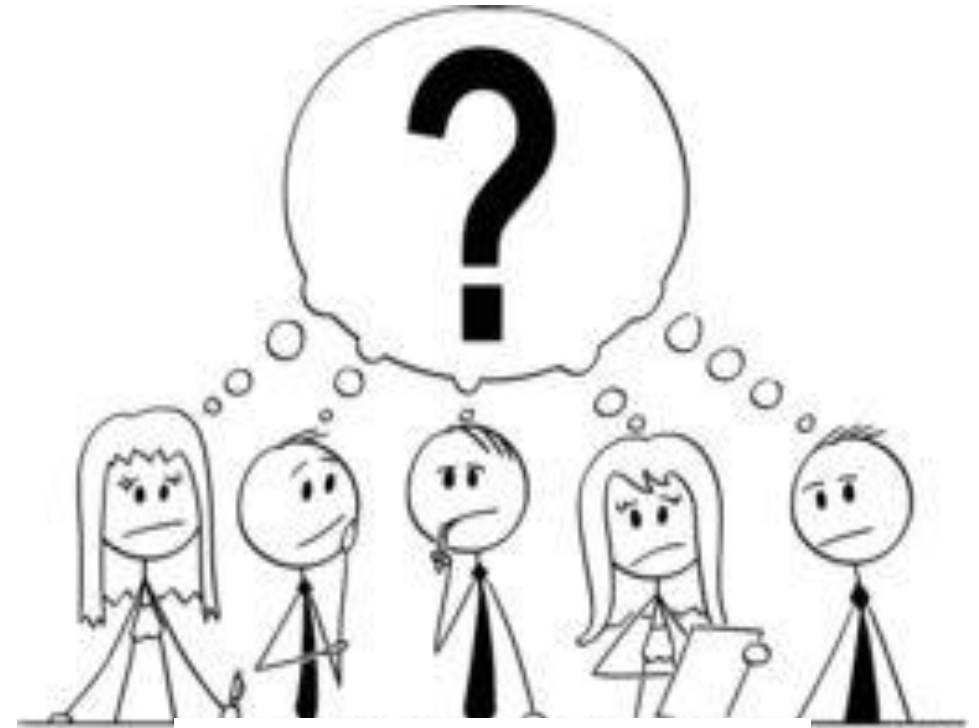

Hospital A staff

Which medication works better  
- **DILAX** or **Relaxil**?

**Your hospital, Hospital A, works with three other hospitals to figure out which medication works best.**

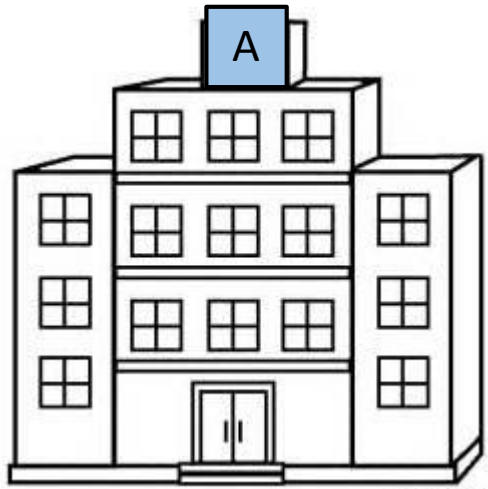

**Hospital A**

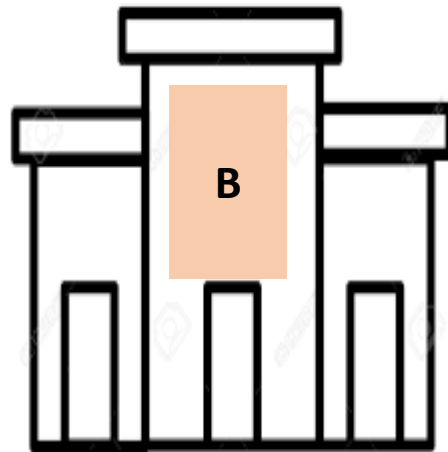

**Hospital B**

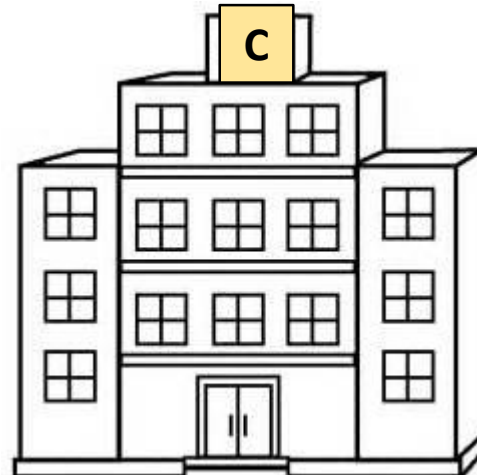

**Hospital C**

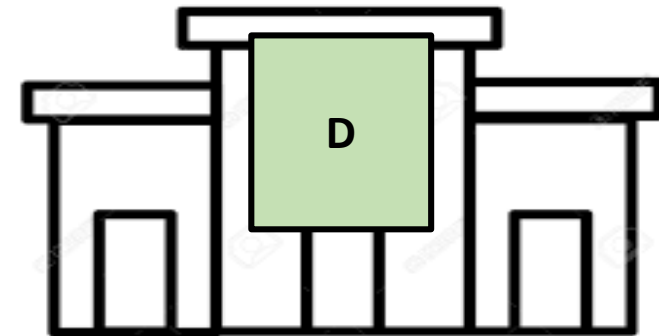

**Hospital D**

The four hospitals agree to be randomly assigned one of the two drugs being compared (**DILAX** or **Relaxil**) to use to treat to their patients with high blood pressure.



Hospital A

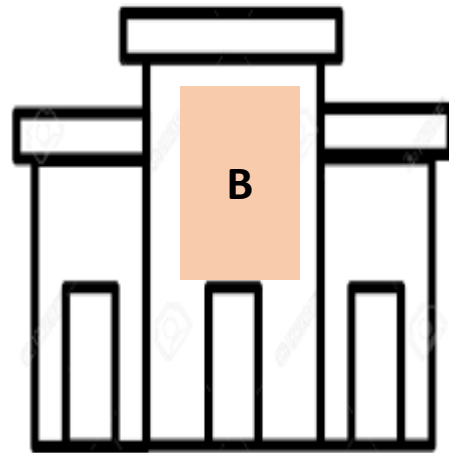

Hospital B

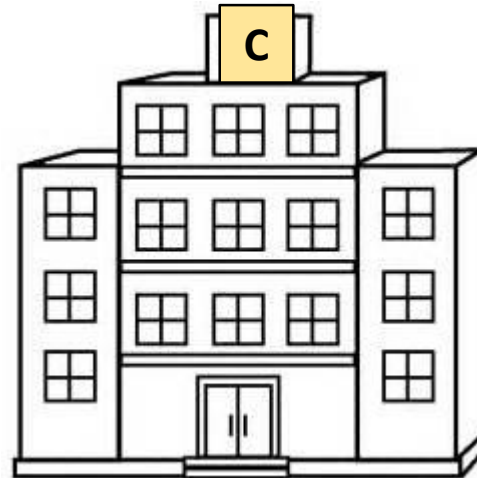

Hospital C

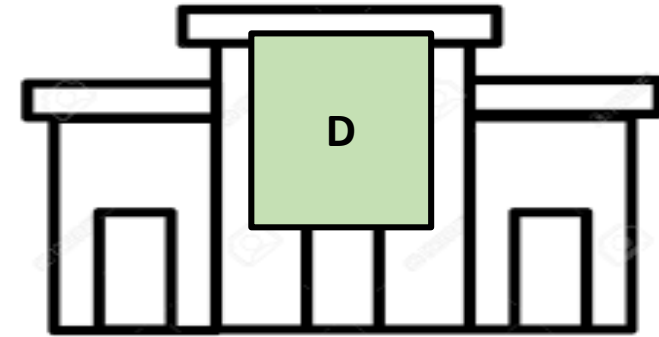

Hospital D

# Why do we mean when we say “randomly assigned”?

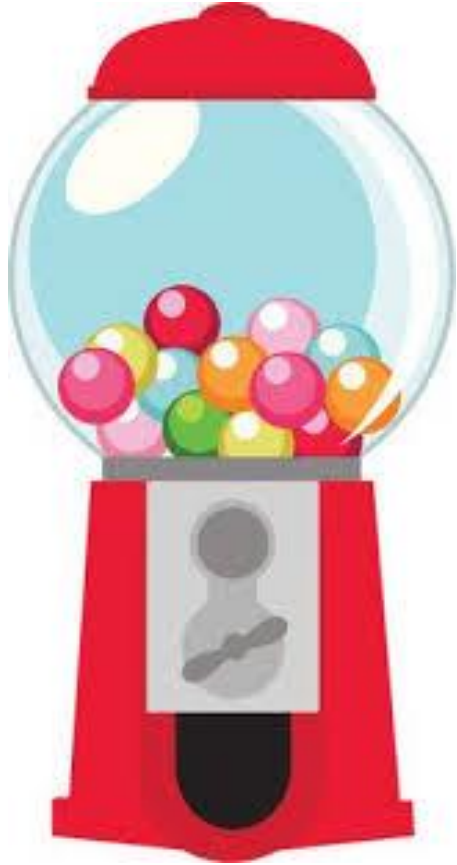

- Imagine a gumball machine. You put in a quarter, and a gumball comes out.
- You don't get to choose the color of the gumball, because it's decided by chance. You will randomly get a red gumball, a green gumball, or a blue gumball.
- One way to find out if one drug works better is to randomly assign each hospital one of the two drugs. By chance, some hospitals will be assigned to get **DILAX** and others will be assigned **Relaxil**.
- This randomization 'evens out' any differences between the groups so that any differences in the results would be due to the drug.

- By chance, some hospitals are assigned **DILAX** to treat their patients with high blood pressure, while others are assigned **Relaxil**.
- No matter which one medication they are get, the medication is one that is currently in use and is known to be safe and effective for treating high blood pressure.

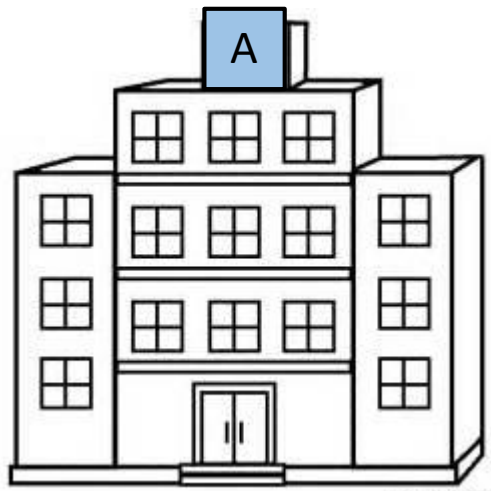

**DILAX**

Hospital A

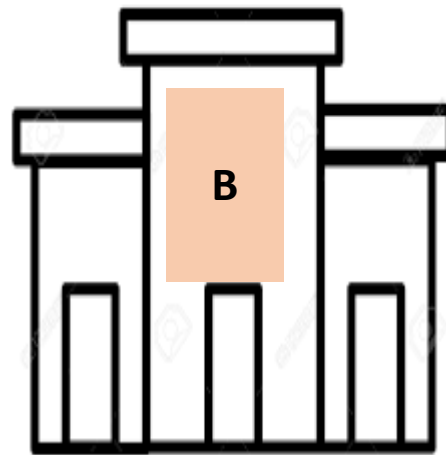

**Relaxil**

Hospital B

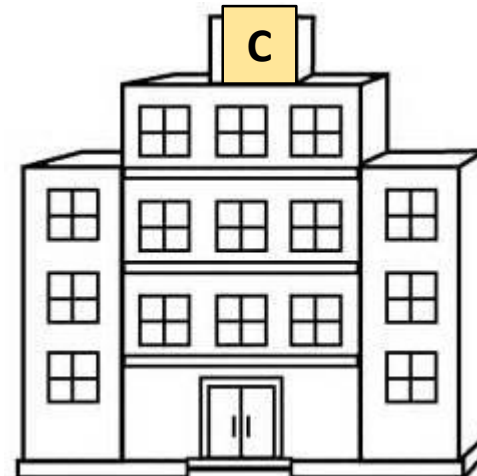

**Relaxil**

Hospital C

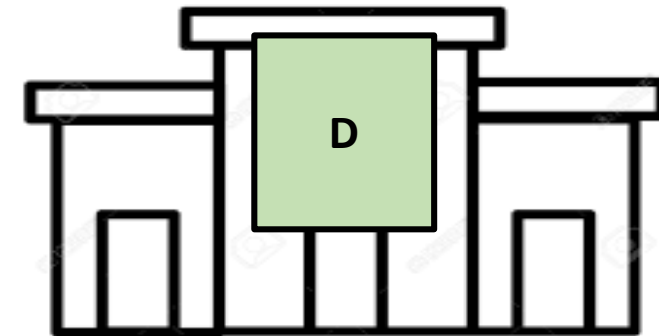

**DILAX**

Hospital D



# To answer the question, each hospital:

Runs a computer program to search their electronic health records (EHRs) to find those patients who have been diagnosed high blood pressure and have been prescribed either **DILAX** or **Relaxil**.

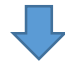

The computer programs collect the following information on each of their patients who have been diagnosed with high blood pressure and treated with one of the two medications:

- List of medications they are taking
- Their blood pressure levels recorded at each of their clinical visits.
- Any side effects from the medication

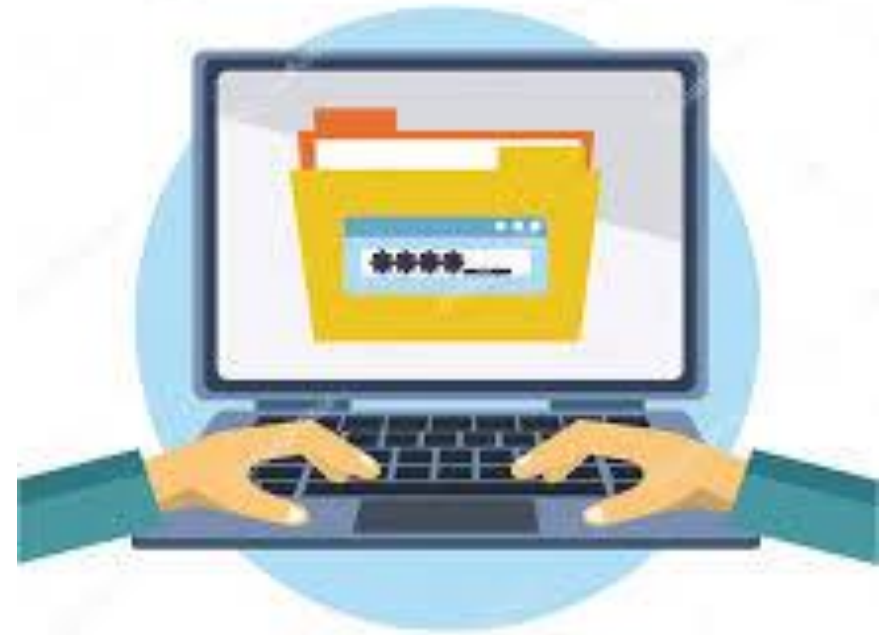

Each hospital shares their data with the team at Hospital B who will combine all the data and analyze it together.

**A few important things to note:**

- Before sharing their patient information with Hospital B, each hospital removes the names of their patients (along with any other identifying information) and replaces it with a code.
  - For example, John Smith becomes HABPP2 (Hospital A, blood pressure patient 2)
- Hospital B does not have access to any identifying information about the patients from the other hospitals.

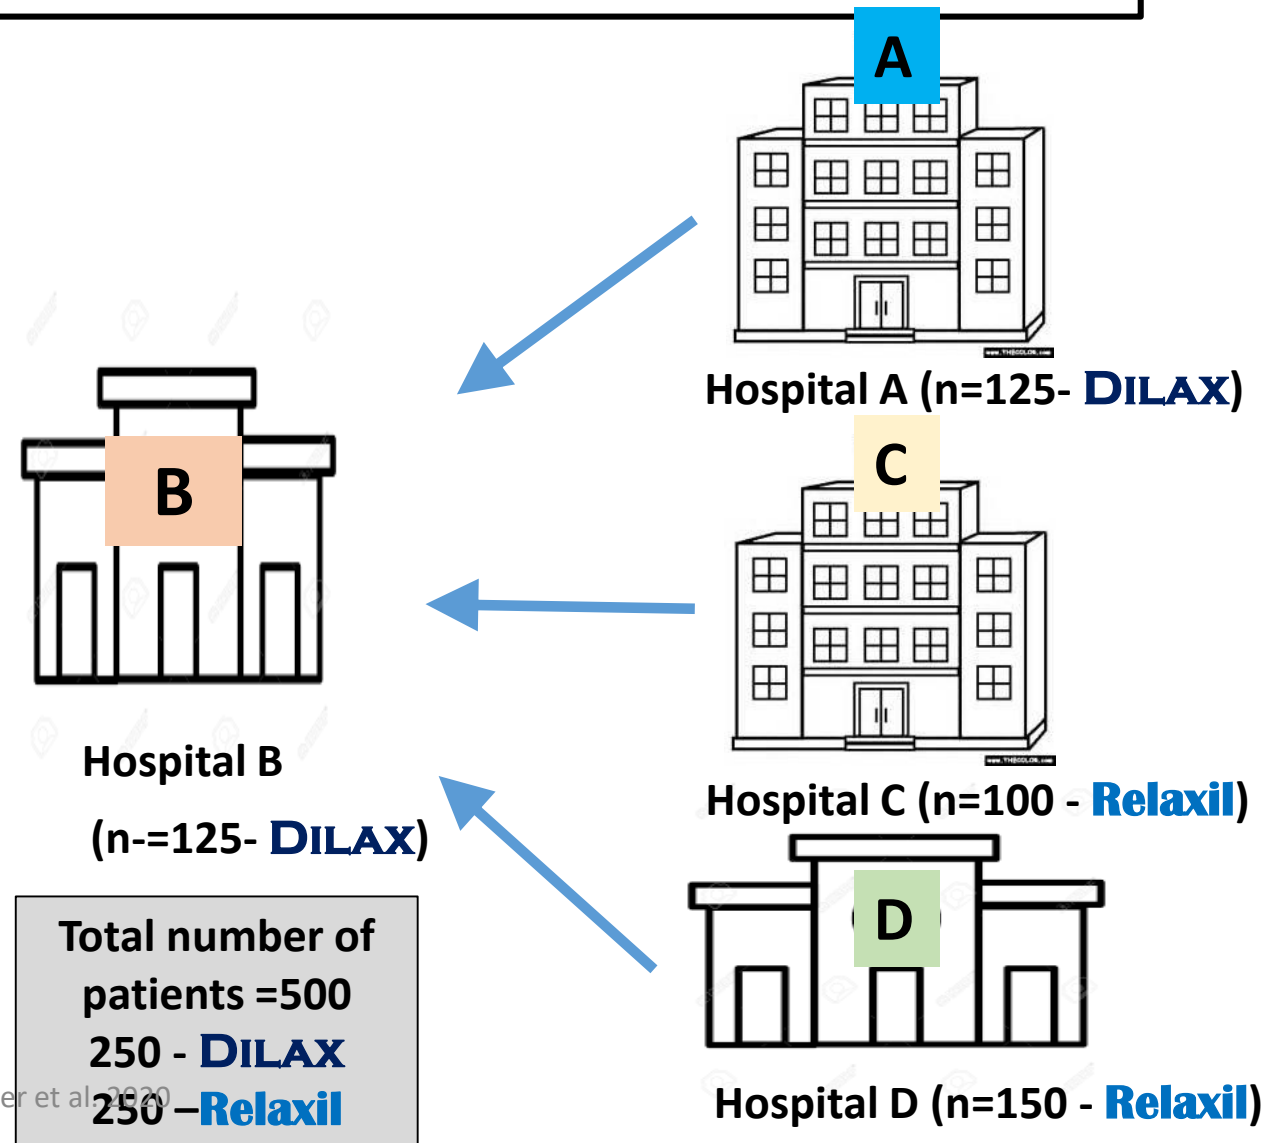

# Now they can compare the blood pressure values between the two groups of patients

Patients prescribed **DILAX**  
(n=250)

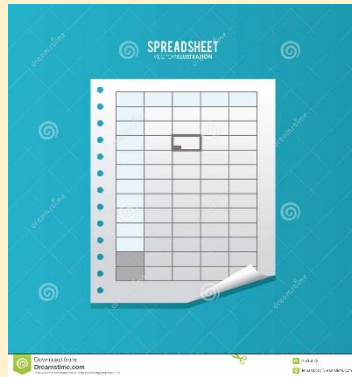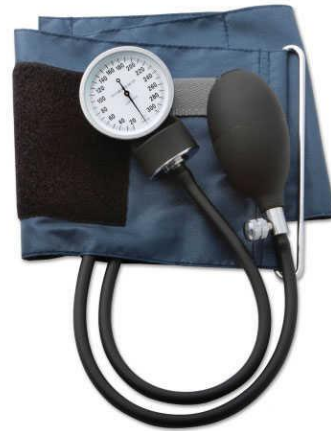

Blood pressure values

Patients prescribed **Relaxil**  
(n=250)

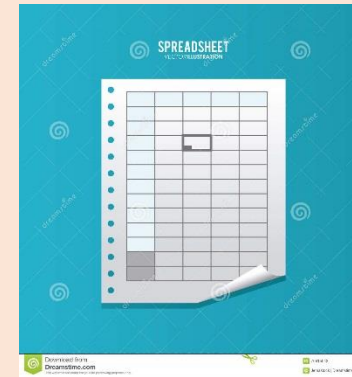

Which works better - **DILAX** or **Relaxil**?

# Questions for the group:

- **What** information would you want to know?
  - Medical implications
  - Other information
- **How** would you *feel* when you receive the information?
- **How** would you want to receive this information?
- **Who** do you think should return this information to you?
